# Supplementary material for: Clinical Significance of Tumor Microenvironment in Acral Melanoma: A Large Single-Institution Study of Caucasians
Source: MDPI journal article supplement (doi:10.3390/jcm10071452), 2021-04-01
Supplement: s1 [file s1]

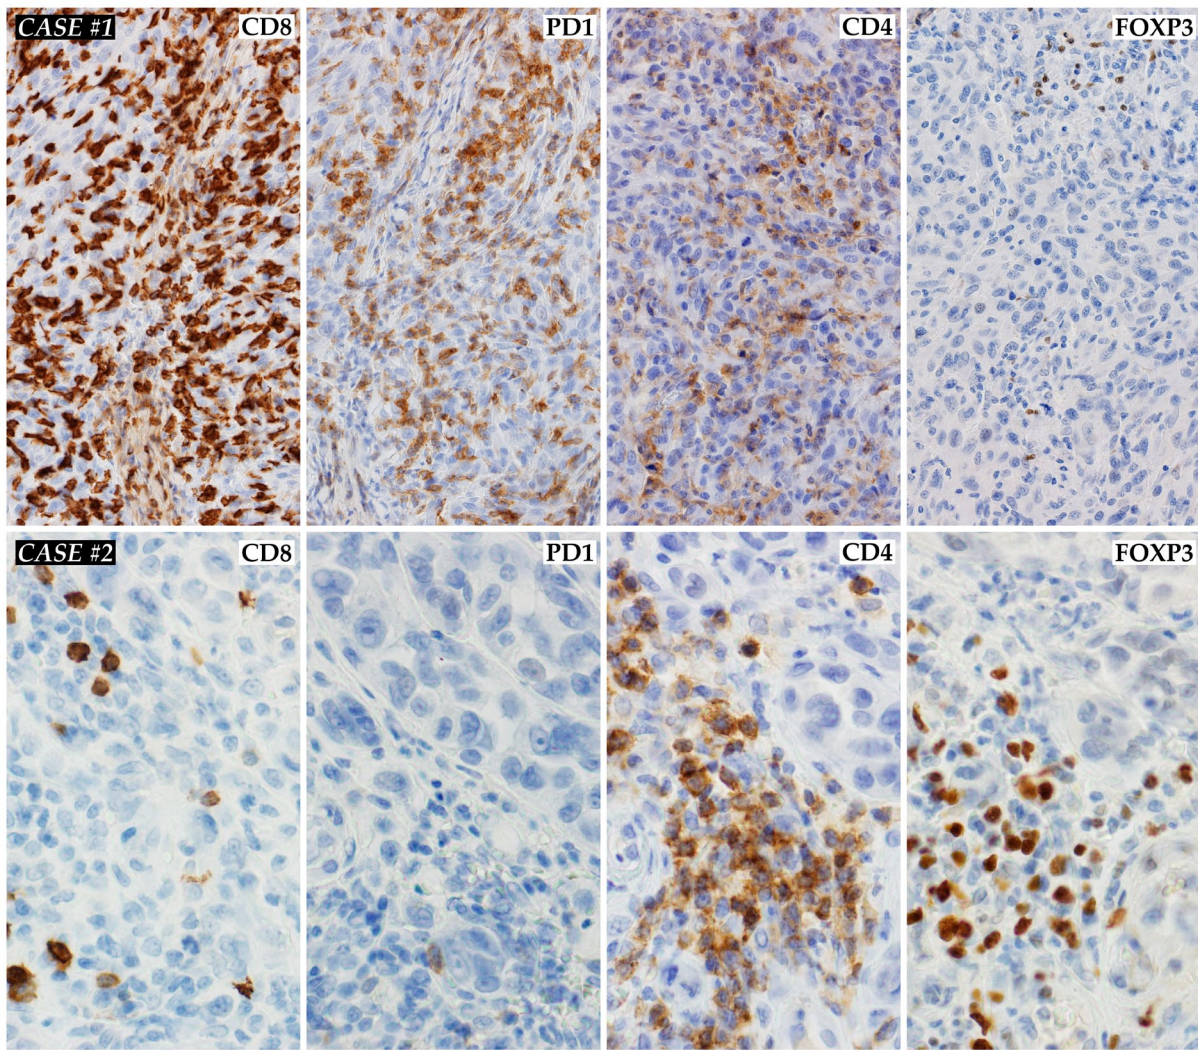

**Supplementary Figure 1.** The high magnification images of TILs immunoprofile; Case #1 was characterized with increased infiltration of CD8(+) and PD1(+) cells, lower CD4(+) cells, and sparse population of FOXP3(+) cells (200x); Case #2 was accompanied with CD4(+) and FOXP(+) T-cells infiltration with the low density of CD8(+) and PD1(+) cells (400x).

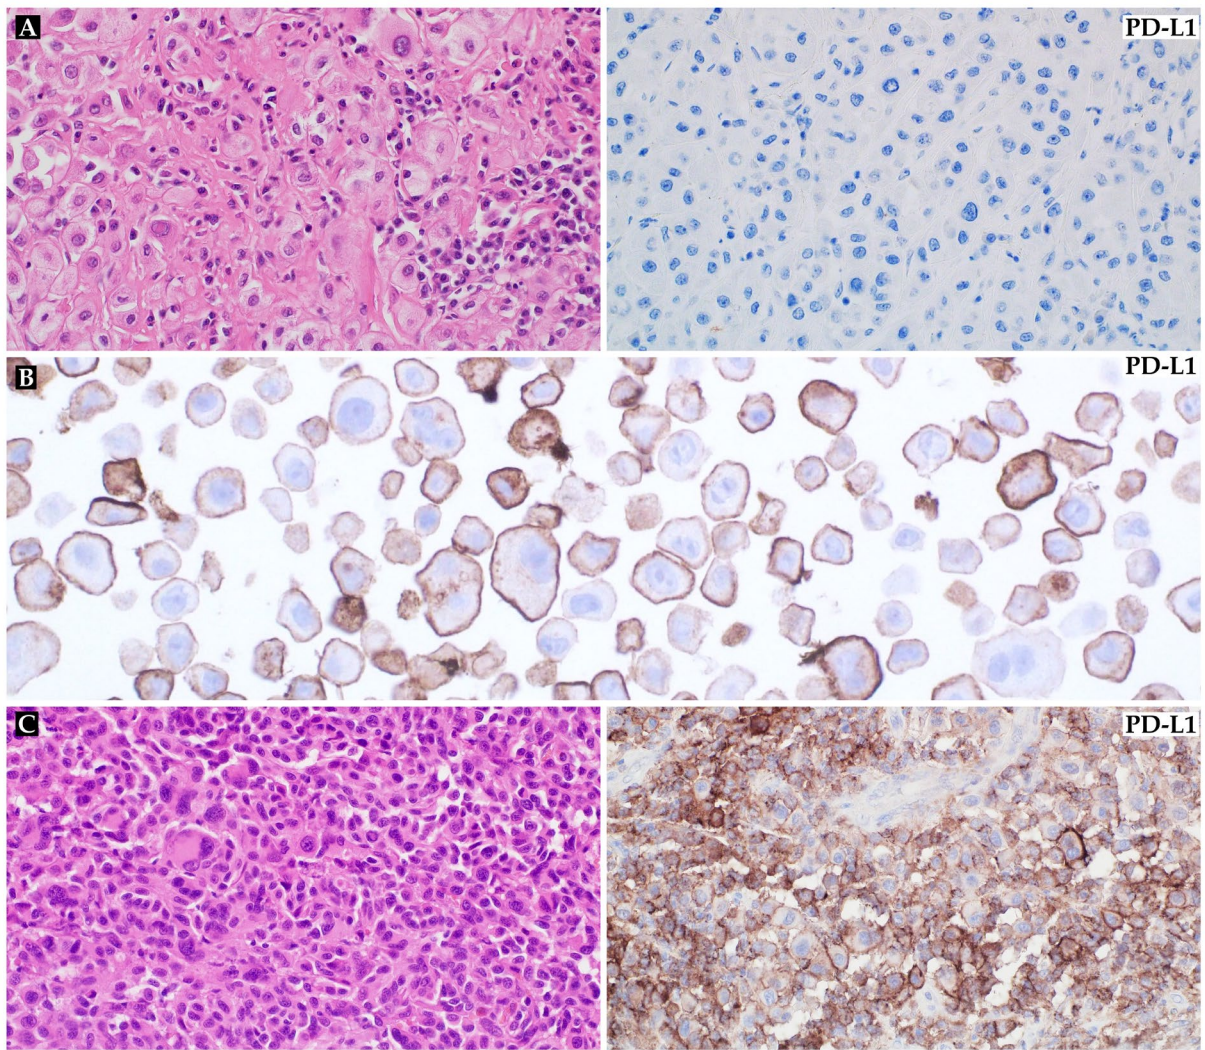

**Supplementary Figure 2.** PD-L1 immunohistochemical expression pattern: the negative (A, 200x) and positive (C, 400x) case with positive control „in-between” (B, 200x).

**Supplementary Table 1.** PD-L1 expression status in correlation with TILs characteristics. Statistical significance ( $p \leq 0.05$ ) was bolded and marked with \*.

|       | <b>TILs<br/>Clark</b> | <b>TILs<br/>MIA<br/>Grade</b> | <b>TILs<br/>MIA<br/>Density</b> | <b>TILs MIA<br/>Distribution</b> | <b>CD8</b>   | <b>CD4</b>   | <b>FOXP3</b> | <b>PD-1</b>  |
|-------|-----------------------|-------------------------------|---------------------------------|----------------------------------|--------------|--------------|--------------|--------------|
| PD-L1 | <b>0.01*</b>          | <b>0.02*</b>                  | <b>0.03*</b>                    | <b>0.05*</b>                     | <b>0.01*</b> | <b>0.01*</b> | <b>0.01*</b> | <b>0.01*</b> |

TILs - tumor-infiltrating lymphocytes, MIA – Melanoma Institute of Australia
